# Supplementary material for: Short P‐Wave Duration is a Marker of Higher Rate of Atrial Fibrillation Recurrences after Pulmonary Vein Isolation: New Insights into the Pathophysiological Mechanisms Through Computer Simulations
Source: PubMed Central journal article supplement — J Am Heart Assoc. 2021 Jan 7;10(2):e018572. doi: 10.1161/JAHA.120.018572 (PMC7955300; doi:10.1161/jaha.120.018572), 2021-01-07
Supplement: JAH3-10-e018572-s001.pdf [file JAH3-10-e018572-s001.pdf]

# **Supplemental Material**

## Data S1.

### In-silico P-wave simulation

The computation of the surface P-wave comprised several steps, detailed below. Briefly, the surface potential of a given lead resulted from Green's reciprocity formula with a combination of a fixed action potential (AP) shape, the activation map and the lead field. The action potential shape was computed using the cable theory with a detailed model for the dynamics of the ionic channels. The activation map was obtained from a 3-D propagation or eikonal model. Finally, the lead field resulted from the Poisson's equation in the torso. In mathematical terms, denoting by  $U(\xi)$  the AP shape, by  $\tau(x)$  the activation map and by  $Z_k(x)$  the lead field for some lead  $k = 1, \dots, 12$ , the surface P-wave  $V_k(t)$  read as follows:

$V_k(t) = \int_0^\infty U'(t - \xi) \int_{\tau^{-1}(\xi)} G_{in} n \cdot \nabla Z_k(x) d\sigma(x) d\xi$ , where  $\tau^{-1}(\xi)$  is the activation front at time  $\xi$ , that is the set  $\{x \in \Omega: \tau(x) = \xi\}$ , and  $n$  is the normal direction in the propagation direction.

#### *Action potential model*

The AP was simulated on a 1-D, 5 cm long fiber strand with the monodomain equation coupled with the Skibsbjerg model for the ionic currents.<sup>20</sup> The fiber conductivity was 1.5 mS/cm and the surface-to-volume ratio was 1000 cm<sup>-1</sup>. A stimulus was applied in a 1-mm region on the left side of the fiber to trigger a propagation of the AP from left end towards the right end. The average conduction velocity was evaluated by taking the difference in activation time at 1 cm and 4 cm divided by the distance. Finally, the AP shape was extracted from the transmembrane potential at  $x = 2.5$  cm.

#### *Propagation model*

The activation map  $\tau(x)$  was simulated using the eikonal equation, which simulated the spread of an activation front from a selected origin and with given spatially varying, direction-dependent conduction velocity encoded in a tensor  $D(x)$ . Mathematically, the equation reads:

$$\begin{cases} \sqrt{D(x) \nabla \tau \cdot \nabla \tau} = 1, \\ \tau(x_0) = 0. \end{cases}$$

The earliest activation site  $x_0$  was located in the sinoatrial node region. The conduction tensor was set as

$D = \frac{\theta^2}{\beta} G_{in} (G_{in} + G_{ex})^{-1} G_{ex}$  where  $\beta$  was the myocyte surface-to-volume ratio and  $G_{in}$  and  $G_{ex}$  were respectively the intra- and extra-cellular electric conductivity. The scaling parameter  $\theta$  was extrapolated from the 1-D simulation and estimated as follows:

$\theta = CV \cdot \sqrt{\beta \sigma^{-1}}$ , where parameters were as in the previous section.

#### *Lead field computation*

Twelve lead fields were computed, one for each lead of the 12-lead ECG. Each lead field solved the following problem in the whole torso (with zero-flux boundary conditions at the chest):

$$-\nabla \cdot (G \nabla Z) = \begin{cases} -1 & \text{at negative electrode,} \\ +1 & \text{at positive electrode,} \end{cases} \text{ where } G = G_{in} + G_{ex} \text{ was the bulk conductivity. The bulk}$$

conductivity in the torso was heterogeneous, with distinct values in the blood, lungs, myocardium, skeletal muscles and skin. Furthermore, skeletal muscle and myocardium were assumed anisotropic.
